# Supplementary material
Source: publisher figshare collection journal article supplement (https://brill.figshare.com/articles/dataset/_/25690455)
Supplement: Supplementary file 1 [file 1]

## Sheet: Table S1. FieldData 2023
Table S1. Detailed field data of our survey of Phlebotomine sand flies across their northern distribution range limit in Western Europe, summer 2023.																Number of papers								Phlebotomus mascittii
																Number of trap-nights										Phlebotomus perniciosus
Site information						WGS84	WGS84			Catch information												Catch result
Country	Admin_NUTS3	Location_ID	Site_ID	Location name	Sampling address	Latitude Y	Longitude X	Altitude (m)	LandUse	User	Column1	Date_Start	Time_Start	Date_End	Time_End	Trap_Type	Indoor/Outdoor	CO2	Comment	Site_description	Trap_Number	Night_Number	Total_SF	Ph_mas_F	Ph_mas_M	Ph_per_F	Ph_per_M
France	Ain	SF01-001	SF01-001a	Ceyzérieu	Aignoz	45.8327	5.7442	231	Rural habitat	Francis Schaffner + Trainees FR	SF01-001a_230705	2023-07-04	17:15:00	2023-07-05	09:10:00	Light trap EVS	O	Yes		Garden, poultry run	1	1	1	1
France	Ain	SF01-001	SF01-001b	Ceyzérieu	Aignoz	45.8327	5.74424	231	Rural habitat	Francis Schaffner + Trainees FR	SF01-001b_230705	2023-07-04	17:15:00	2023-07-05	09:11:00	Light trap	O/I			Henhouse & dovecote, fence walls	1	1	3	3
France	Ain	SF01-002	SF01-002a	Culoz	Route de Savoie	45.8495	5.76485	237	Suburban habitat	Francis Schaffner + Trainees FR	SF01-002a_230705	2023-07-04	17:07:00	2023-07-05	09:34:00	Light trap	O/I			Gallery connecting old lime kilns, semi open	1	1	0
France	Ain	SF01-003	SF01-003a	Culoz	Rue de Luyrieux	45.8432	5.77762	236	Suburban habitat	Francis Schaffner + Trainees FR	SF01-003a_230705	2023-07-04	17:26:00	2023-07-05	09:42:00	Light trap	O			Base rocks, along road, shaded	1	1	0
France	Ain	SF01-004	SF01-004a	Talissieu	Talissieu	45.866	5.72242	239	Rural habitat	Francis Schaffner + Trainees FR	SF01-004a_230705	2023-07-04	17:49:00	2023-07-05	09:25:00	Light trap	O			Between two old barns	1	1	0
France	Ardennes	SF08-001	SF08-001a	Puilly-et-Charbeaux	Puilly, Rue Principale	49.6297	5.27277	219	Rural habitat	Francis Schaffner	SF08-001a_230717	2023-07-16	19:45:00	2023-07-17	08:34:00	Light trap	I			Abandoned house, stable part, ground floor	1	1	0
France	Ardennes	SF08-001	SF08-001b	Puilly-et-Charbeaux	Puilly, Rue Haute	49.6302	5.27303	219	Rural habitat	Francis Schaffner	SF08-001b_230717	2023-07-16	20:05:00	2023-07-17	08:45:00	Light trap	I			Cellar inhabited house, owner being bitten	1	1	0
France	Ardennes	SF08-001	SF08-001c	Puilly-et-Charbeaux	Puilly, Rue d'Olvesse	49.632	5.2683	219	Rural habitat	Francis Schaffner	SF08-001c_230717	2023-07-16	20:25:00	2023-07-17	08:09:00	Light trap	O/I			Small open shelter (roof destroyed)	1	1	0
France	Ardennes	SF08-001	SF08-001d	Puilly-et-Charbeaux	Puilly, Rue d'Olvesse	49.6316	5.26852	219	Rural habitat	Francis Schaffner	SF08-001d_230717	2023-07-16	20:40:00	2023-07-17	08:09:00	Light trap	O/I			Small cave with spring, given on to lavoir	1	1	0
France	Ardennes	SF08-001	SF08-001e	Puilly-et-Charbeaux	Puilly, Rue Principale	49.6299	5.27271	219	Rural habitat	Francis Schaffner	SF08-001e_230716	2023-07-16	21:55:00	2023-07-16	22:47:00	Human landing	I			Indoor abandoned houses	1	0	0
France	Doubs	SF25-001	SF25-001a	Seloncourt	Rue du Château d'Eau, Temple protestant	47.4594	6.8592	386	Urban habitat	Francis Schaffner	SF25-001a_230803	2023-08-03	10:20:00	2023-08-03	10:40:00	Human landing	I			Indoor chuch/temple	1	0	1	1
France	Doubs	SF25-002	SF25-002a	Dambelin	Rue du Recteur Prélot, jardins contrebas Eglise	47.3744	6.6766	447	Rural habitat	Francis Schaffner	SF25-002a_230819	2023-08-18	18:18:00	2023-08-19	10:12:00	Light trap	O			Garden, stone walls, SE exposed	1	1	0
France	Doubs	SF25-002	SF25-002b	Dambelin	Rue du Recteur Prélot, Eglise	47.3749	6.67643	447	Rural habitat	Francis Schaffner	SF25-002b_230819	2023-08-18	18:31:00	2023-08-19	10:04:00	Light trap	O			Garden, wall church, small hole ground floor, N exposed	1	1	0
France	Doubs	SF25-003	SF25-003a	Branne	Grande Rue	47.3778	6.47443	297	Rural habitat	Francis Schaffner	SF25-003a_230819	2023-08-18	19:13:00	2023-08-19	09:25:00	Light trap	I/O			Open barn, ground floor, stone walls, E exposed	1	1	0
France	Doubs	SF25-003	SF25-003b	Branne	Grande Rue	47.3779	6.47462	297	Rural habitat	Francis Schaffner	SF25-003b_230819	2023-08-18	19:22:00	2023-08-19	09:30:00	Light trap	O			Garden, stone walls, NW exposed	1	1	0
France	Doubs	SF25-003	SF25-003c	Branne	Grande Rue	47.376	6.47133	297	Rural habitat	Francis Schaffner	SF25-003c_230819	2023-08-18	19:38:00	2023-08-19	09:22:00	Light trap	O			Stone wall, unused house, entrance barn, SE exposed	1	1	0
France	Doubs	SF25-004	SF25-004a	Baume-les-Dames	La Grange Ravey, Route Nationale, D683	47.3549	6.38888	356	Rural habitat	Francis Schaffner	SF25-004a_230819	2023-08-18	19:57:00	2023-08-19	09:13:00	Light trap	O			Stone wall, nearby spring&fountain, shaded, S exposed	1	1	0
France	Doubs	SF25-004	SF25-004b	Baume-les-Dames	La Grange Ravey, Route Nationale, D683	47.3549	6.38894	356	Rural habitat	Francis Schaffner	SF25-004b_230819	2023-08-18	19:58:00	2023-08-19	09:02:00	Light trap	I/O			Ruine, semi-open, stone walls	1	1	0
France	Doubs	SF25-004	SF25-004c	Baume-les-Dames	La Grange Ravey, Route Nationale, D683	47.356	6.3913	356	Rural habitat	Francis Schaffner	SF25-004c_230819	2023-08-18	20:10:00	2023-08-19	08:54:00	Light trap	O			Base rocks, behind ruine, S exposed	1	1	0
France	Doubs	SF25-005	SF25-005a	Hyèvre-Magny	Chemin de Halage, Est	47.3644	6.44295	308	Nature-other	Francis Schaffner	SF25-005a_230819	2023-08-18	20:36:00	2023-08-19	08:36:00	EVS trap	O			Base rocks, near Doubs river, shaded, E exposed	1	1	0
France	Doubs	SF25-005	SF25-005b	Hyèvre-Magny	Chemin de Halage, Est	47.3648	6.44252	308	Nature-other	Francis Schaffner	SF25-005b_230819	2023-08-18	22:45:00	2023-08-19	23:05:00	Human landing	O			Base rocks, near Doubs river	1	0	0
France	Jura	SF39-001	SF39-001a	Hautecour	Route de la Forêt, D145E	46.5698	5.76831	664	Agriculture	Francis Schaffner + Trainees FR	SF39-001a_230706	2023-07-05	18:18:00	2023-07-06	07:24:00	Light trap	I			Duck shelter, indoor	1	1	0
France	Jura	SF39-001	SF39-001b	Hautecour	Route de la Forêt, D145E	46.5698	5.76838	664	Agriculture	Francis Schaffner + Trainees FR	SF39-001b_230706	2023-07-05	18:24:00	2023-07-06	07:30:00	Light trap	O/I			Barn, one side open, north exposed	1	1	0
France	Jura	SF39-001	SF39-001c	Hautecour	Route de la Forêt, D145E	46.5698	5.76854	664	Agriculture	Francis Schaffner + Trainees FR	SF39-001c_230706	2023-07-05	18:22:00	2023-07-06	07:24:00	Light trap	O			Shelter besides henhouse, north exposed	1	1	0
France	Jura	SF39-001	SF39-001d	Hautecour	Route de la Forêt, D145E	46.5697	5.76835	664	Agriculture	Francis Schaffner + Trainees FR	SF39-001d_230706	2023-07-05	18:32:00	2023-07-06	07:16:00	Light trap	O			Base barn wall, S exposed	1	1	0
France	Jura	SF39-002	SF39-002a	Conliège	Rue de Chonay	46.6556	5.60027	525	Rural habitat	Francis Schaffner	SF39-002a_230707	2023-07-06	19:43:00	2023-07-07	08:04:00	Light trap	O/I			Old fountain, stone wall recess, S exposed	1	1	0
France	Jura	SF39-002	SF39-002b	Conliège	Rue de Chonay	46.6554	5.60036	525	Rural habitat	Francis Schaffner	SF39-002b_230707	2023-07-06	19:50:00	2023-07-07	08:04:00	Light trap	I			Cellar, old toilets, indoor	1	1	0
France	Jura	SF39-002	SF39-002c	Conliège	Rue Haute	46.6556	5.60374	525	Rural habitat	Francis Schaffner	SF39-002c_230707	2023-07-06	20:07:00	2023-07-07	08:18:00	Light trap	O/I			Ruin cellar, roof mostly open	1	1	0
France	Jura	SF39-002	SF39-002d	Conliège	Rue Haute	46.6555	5.60357	525	Rural habitat	Francis Schaffner	SF39-002d_230707	2023-07-06	20:15:00	2023-07-07	08:19:00	Light trap	O/I			House courtyard giving to five cellars	1	1	0
France	Jura	SF39-003	SF39-003a	Montigny-lès-Arsures	Rue de l'Eglise, D249	46.9232	5.78043	423	Rural habitat	Francis Schaffner	SF39-003a_230708	2023-07-07	18:17:00	2023-07-08	07:51:00	Light trap	O/I			House, entrance old rabbit shelter, S exposed	1	1	0
France	Jura	SF39-003	SF39-003b	Montigny-lès-Arsures	Rue de l'Eglise, D249	46.9231	5.78047	423	Rural habitat	Francis Schaffner	SF39-003b_230708	2023-07-07	18:22:00	2023-07-08	07:51:00	Light trap	O			Stone wall, former (destroyed) henhouse	1	1	0
France	Jura	SF39-003	SF39-003c	Montigny-lès-Arsures	Chemin de Chanoux	46.921	5.7797	423	Rural habitat	Francis Schaffner	SF39-003c_230708	2023-07-07	18:39:00	2023-07-08	07:58:00	Light trap	O/I			House cellar entrance and old open henhouse	1	1	3	3
France	Jura	SF39-003	SF39-003d	Montigny-lès-Arsures	Chemin de Chanoux	46.921	5.77993	423	Rural habitat	Francis Schaffner	SF39-003d_230708	2023-07-07	18:45:00	2023-07-08	08:02:00	Light trap	O/I			Small barn ruined, stone walls, shaded	1	1	0
France	Jura	SF39-003	SF39-003e	Montigny-lès-Arsures	Rue de l'Eglise, D249	46.9232	5.78049	423	Rural habitat	Francis Schaffner	SF39-003e_230707	2023-07-07	22:50:00	2023-07-07	23:10:00	Human landing	O			Besides unused house, base wall, S exposed	1	0	2	2
France	Haute-Marne	SF52-001	SF52-001a	Anrosey	Rue du Grand Jardin	47.8369	5.67311	243	Rural habitat	Francis Schaffner	SF52-001a_230812	2023-08-11	17:15:00	2023-08-12	09:35:00	Light trap	O/I			Old barn, ground floor, at window open to garden, S exposed	1	1	0
France	Haute-Marne	SF52-001	SF52-001b	Anrosey	Rue du Grand Jardin	47.8366	5.67247	243	Rural habitat	Francis Schaffner	SF52-001b_230812	2023-08-11	17:22:00	2023-08-12	09:40:00	Light trap	O/I			Ruin, semi-open, ground floor, stone walls	1	1	2	2
France	Haute-Marne	SF52-002	SF52-002a	Fresne-sur-Apance	Grande Rue	47.941	5.83442	265	Rural habitat	Francis Schaffner	SF52-002a_230812	2023-08-11	18:38:00	2023-08-12	08:55:00	Light trap	O/I			Old barn, semi-open, ground floor, S exposed	1	1	6	6
France	Meuthe-et-Moselle	SF54-001	SF54-001a	Vaudémont	Fosse fortification Est	48.4157	6.05819	495	Rural habitat	Francis Schaffner	SF54-001a_230720	2023-07-20	13:23:00	2023-07-20	09:40:00	Light trap EVS	O	Yes		Base rocks, pit remparts, W exposed	1	0	0
France	Meuthe-et-Moselle	SF54-001	SF54-001b	Vaudémont	Rue Maurice Barres	48.4154	6.05736	495	Rural habitat	Francis Schaffner	SF54-001b_230720	2023-07-20	13:41:00	2023-07-20	09:30:00	Light trap	O			Ruin, stone walls	1	0	0
France	Meuthe-et-Moselle	SF54-001	SF54-001c	Vaudémont	Rue de l'Eglise, rempards	48.4164	6.05549	495	Rural habitat	Francis Schaffner	SF54-001c_230720	2023-07-20	13:54:00	2023-07-20	09:23:00	Light trap	O			Base rocks, rempart S exposed	1	0	2	2
France	Meuthe-et-Moselle	SF54-002	SF54-002a	Maron	Falaise de Maron	48.652	6.04059	329	Forest and shrub	Francis Schaffner	SF54-002a_230720	2023-07-19	19:52:00	2023-07-20	08:06:00	Light trap	O		Trap off	Base rocks & cliff, middle level, S exposed	1	1	0
France	Meuthe-et-Moselle	SF54-002	SF54-002b	Maron	Falaise de Maron	48.6515	6.04169	350	Forest and shrub	Francis Schaffner	SF54-002b_230720	2023-07-19	20:26:00	2023-07-20	08:16:00	Light trap	O			Base cliff, higher level, S exposed	1	1	0
France	Meuthe-et-Moselle	SF54-002	SF54-002c	Maron	Falaise de Maron	48.6511	6.04221	350	Forest and shrub	Francis Schaffner	SF54-002c_230720	2023-07-19	20:32:00	2023-07-20	08:19:00	Light trap	O			Base cliff, higher level, S exposed	1	1	0
France	Meuthe-et-Moselle	SF54-002	SF54-002d	Maron	Falaise de Maron	48.6505	6.04245	350	Forest and shrub	Francis Schaffner	SF54-002d_230720	2023-07-19	20:33:00	2023-07-20	08:08:00	Light trap	O/I			Base cliff, middle level, entrance cave, S exposed	1	1	0
France	Meuse	SF55-001	SF55-001a	Avioth	Rue des Seigneurs de Breux, D110	49.5717	5.38941	232	Agriculture	Francis Schaffner	SF55-001a_230717	2023-07-17	12:03:00	2023-07-17	09:32:00	Light trap	I			Old unused farmhouse, ground soil	1	0	0
France	Meuse	SF55-001	SF55-001b	Avioth	Rue de Saint-Brice, D198	49.5661	5.39206	216	Rural habitat	Francis Schaffner	SF55-001b_230717	2023-07-16	18:30:00	2023-07-17	09:45:00	Light trap	I			Barn cellar, ground soil (rodents and bats)	1	1	0
France	Meuse	SF55-002	SF55-002a	Thonne-la-Long	Rue Grande	49.5626	5.42662	237	Rural habitat	Francis Schaffner	SF55-002a_230717	2023-07-16	18:50:00	2023-07-17	09:50:00	Light trap	O			Old house wall and shelter entrance, garden, S exposed	1	1	1	1
France	Moselle	SF57-001	SF57-001a	Contz-les-Bains	Rue du Pressoir	49.4539	6.34514	286	Rural habitat	Francis Schaffner	SF57-001a_230718	2023-07-17	19:31:00	2023-07-18	08:33:00	Light trap	O			Garden (not maintained), stone walls, terraces, S exposed	1	1	0
France	Moselle	SF57-001	SF57-001b	Contz-les-Bains	Rue du Pressoir	49.4537	6.34453	286	Rural habitat	Francis Schaffner	SF57-001b_230718	2023-07-17	19:33:00	2023-07-18	08:36:00	Light trap	O			Garden terraces, stone wall, shaded and wind protected, A exposed	1	1	0
France	Moselle	SF57-001	SF57-001c	Contz-les-Bains	Rue du Vignoble	49.452	6.34824	286	Rural habitat	Francis Schaffner	SF57-001c_230718	2023-07-17	19:48:00	2023-07-18	08:29:00	Light trap	O/I			Courtyard between inhabited houses, ground floor, stone walls	1	1	0
France	Moselle	SF57-001	SF57-001d	Contz-les-Bains	Village	49.4539	6.34572	286	Rural habitat	Francis Schaffner	SF57-001d_230718	2023-07-17	23:26:00	2023-07-18	00:05:00	Human landing	O			Village, gardens, stone walls	1	1	0
France	Moselle	SF57-002	SF57-002a	Contz-les-Bains	Stromberg	49.4484	6.35462	160	Nature-other	Francis Schaffner	SF57-002a_230718	2023-07-17	20:13:00	2023-07-18	07:52:00	Light trap	O			Deep in scree, S exposed	1	1	0
France	Moselle	SF57-002	SF57-002b	Contz-les-Bains	Stromberg	49.4495	6.35399	160	Nature-other	Francis Schaffner	SF57-002b_230718	2023-07-17	20:21:00	2023-07-18	07:55:00	Light trap	O			Ruin, stone wall and rocks, wind protected, S exposed	1	1	0
France	Moselle	SF57-002	SF57-002c	Contz-les-Bains	Stromberg	49.4499	6.35436	160	Nature-other	Francis Schaffner	SF57-002c_230718	2023-07-17	20:27:00	2023-07-18	08:01:00	Light trap	O			Base cliff, rocks, S exposed	1	1	1	1
France	Moselle	SF57-002	SF57-002d	Contz-les-Bains	Stromberg	49.4487	6.3549	160	Nature-other	Francis Schaffner	SF57-002d_230718	2023-07-17	20:37:00	2023-07-18	08:03:00	Light trap	O			Rock hole, S exposed	1	1	0
France	Moselle	SF57-002	SF57-002e	Contz-les-Bains	Stromberg	49.4488	6.35576	160	Nature-other	Francis Schaffner	SF57-002e_230718	2023-07-17	20:48:00	2023-07-18	08:08:00	Light trap	O			Base cliff, crevace, S exposed	1	1	0
France	Moselle	SF57-002	SF57-002f	Contz-les-Bains	Stromberg	49.4492	6.35479	160	Nature-other	Francis Schaffner	SF57-002f_230717	2023-07-17	22:25:00	2023-07-17	23:08:00	Human landing	O			Near rocks and cliffs	1	0	0
France	Bas-Rhin	SF67-001	SF67-001a	Durrenbach	Rue du Café	48.8948	7.77969	155	Rural habitat	Francis Schaffner	SF67-001a_230821	2023-08-20	19:33:00	2023-08-21	10:31:00	Light trap	I/O			Barn semi open, pork house, unused, cobblestone+ground floor	1	1	0
France	Bas-Rhin	SF67-001	SF67-001b	Durrenbach	Rue du Café	48.8948	7.77984	155	Rural habitat	Francis Schaffner	SF67-001b_230821	2023-08-20	19:38:00	2023-08-21	10:35:00	Light trap	I			Barn, ground clay floor, indoor, S exposed	1	1	0
France	Bas-Rhin	SF67-001	SF67-001c	Durrenbach	Rue du Café	48.8948	7.77987	155	Rural habitat	Francis Schaffner	SF67-001c_230821	2023-08-20	19:39:00	2023-08-21	10:38:00	Light trap	I/O			Open barn, wood, ground floor, S exposed	1	1	0
France	Bas-Rhin	SF67-002	SF67-002a	Wimmenau	Rue de la Montagne	48.9122	7.4188	210	Rural habitat	Francis Schaffner	SF67-002a_230821	2023-08-20	20:37:00	2023-08-21	08:00:00	Light trap	I/O			Open barn, ground floor, W exposed	1	1	0
France	Bas-Rhin	SF67-002	SF67-002b	Wimmenau	Rue de la Montagne	48.9123	7.41839	210	Rural habitat	Francis Schaffner	SF67-002b_230821	2023-08-20	20:43:00	2023-08-21	08:04:00	Light trap	I/O			Entrance barn, cobblestone floor, S exposed	1	1	0
France	Bas-Rhin	SF67-002	SF67-002c	Wimmenau	Rue de la Montagne	48.9123	7.41842	210	Rural habitat	Francis Schaffner	SF67-002c_230821	2023-08-20	20:51:00	2023-08-21	08:09:00	Light trap	I			Barn, cobblestone and ground floor, S exposed	1	1	0
France	Bas-Rhin	SF67-002	SF67-002d	Wimmenau	Rue de la Montagne	48.9121	7.41873	210	Rural habitat	Francis Schaffner	SF67-002d_230821	2023-08-20	20:53:00	2023-08-21	08:12:00	Light trap	O			Garden, stone walls, S exposed	1	1	0
France	Haut-Rhin	SF68-001	SF68-001a	Altkirch	Rue du Char Saint-Quentin	47.6265	7.24835	316	Suburban habitat	Francis Schaffner	SF68-001a_230801	2023-07-31	18:45:00	2023-08-01	10:00:00		O		Rain after 6AM	Stone wall, gardens, shaded, S exposed	1	1	0
France	Haut-Rhin	SF68-001	SF68-001b	Altkirch	Rue du Char Saint-Quentin	47.6265	7.24727	316	Suburban habitat	Francis Schaffner	SF68-001b_230801	2023-07-31	19:02:00	2023-08-01	09:55:00		O		Rain after 6AM	Stone wall, entrance small barn with ground floor, cats, S exposed	1	1	0
France	Haut-Rhin	SF68-001	SF68-001c	Altkirch	Rue du Char Saint-Quentin	47.6267	7.24774	316	Suburban habitat	Francis Schaffner	SF68-001c_230801	2023-07-31	19:08:00	2023-08-01	09:52:00		O		Rain after 6AM	Stone wall, wooden barn, cats, S exposed	1	1	0
France	Haut-Rhin	SF68-001	SF68-001d	Altkirch	Fbg de Mulhouse	47.6264	7.24679	316	Suburban habitat	Francis Schaffner	SF68-001d_230801	2023-07-31	19:25:00	2023-08-01	10:05:00		O		Rain after 6AM	Stone walls, orchards, poultry, S exposed	1	1	0
France	Haut-Rhin	SF68-001	SF68-001e	Altkirch	Fbg de Mulhouse	47.6262	7.24643	316	Suburban habitat	Francis Schaffner	SF68-001e_230801	2023-07-31	19:32:00	2023-08-01	10:10:00	Light trap	I		Rain after 6AM	Barn/henhouse ground floor, stone wall, S exposed	1	1	2	1	1
France	Haut-Rhin	SF68-001	SF68-001f	Altkirch	Rue du Char Saint-Quentin	47.6269	7.2488	316	Agriculture	Francis Schaffner	SF68-001f_230801	2023-07-31	19:54:00	2023-08-01	10:02:00		O		Rain after 6AM	Small wooden sheep shelter, stone wall, bank with small animal burrows, S exposed, shaded	1	1	0
France	Haut-Rhin	SF68-001	SF68-001g	Altkirch	Chemin de Heidwiller, Nécropole nationale	47.6299	7.24277	316	Forest and shrub	Francis Schaffner	SF68-001g_230801	2023-07-31	20:12:00	2023-08-01	09:35:00		O		Rain after 6AM	Stone wall near quarry, forest clearing, S exposed	1	1	0
France	Haut-Rhin	SF68-002	SF68-002a	Cernay	Faubourg d'Uffholtz	47.812	7.17786	290	Urban habitat	Francis Schaffner	SF68-002a_230823	2023-08-22	19:30:00	2023-08-23	08:17:00	Light trap	I			Unused chicken house, ground floor, S exposed, indoor	1	1	0
France	Haut-Rhin	SF68-002	SF68-002b	Cernay	Faubourg d'Uffholtz	47.812	7.17788	290	Urban habitat	Francis Schaffner	SF68-002b_230823	2023-08-22	19:32:00	2023-08-23	08:13:00	Light trap	O			Unused chicken run, chicken hen entrance, S exposed	1	1	0
France	Haut-Rhin	SF68-002	SF68-002c	Cernay	Faubourg d'Uffholtz	47.812	7.17793	290	Urban habitat	Francis Schaffner	SF68-002c_230823	2023-08-22	19:35:00	2023-08-23	08:11:00	Light trap	I/O			Unused chicken run, ground, SE exposed	1	1	0
France	Haut-Rhin	SF68-002	SF68-002d	Cernay	Faubourg d'Uffholtz	47.8125	7.17752	290	Urban habitat	Francis Schaffner	SF68-002d_230823	2023-08-22	19:40:00	2023-08-23	08:07:00	Light trap	O			Unused chicken run, ground floor, old barn, SE exposed	1	1	0
France	Haut-Rhin	SF68-002	SF68-002e	Cernay	Faubourg d'Uffholtz	47.8125	7.17758	290	Urban habitat	Francis Schaffner	SF68-002e_230823	2023-08-22	19:42:00	2023-08-23	08:06:00	Light trap	O			Garden, nearby unused chicken run and barn, SE exposed	1	1	0
France	Haute-Saône	SF70-001	SF70-001a	Aboncourt-Gésincourt	Le Village de Gésincourt	47.7708	5.97146	230	Rural habitat	Francis Schaffner	SF70-001a_230811	2023-08-10	19:37:00	2023-08-11	09:40:00	Light trap	O/I			Old barn, semi-open, stone walls, ground floor	1	1	1		1
France	Haute-Saône	SF70-001	SF70-001b	Aboncourt-Gésincourt	Le Village de Gésincourt	47.7709	5.97166	230	Rural habitat	Francis Schaffner	SF70-001b_230811	2023-08-10	19:40:00	2023-08-11	09:45:00	Light trap	O/I		Trap off	Old barn, semi-open, stone walls, ground floor	1	1	0
France	Haute-Saône	SF70-002	SF70-002a	Jussey	Rue Thiers	47.824	5.90328	220	Rural habitat	Francis Schaffner	SF70-002a_230811	2023-08-10	20:18:00	2023-08-11	09:25:00	Light trap	I			Unused barn, rabbit house, ground soil, stone walls, indoor	1	1	0
France	Haute-Saône	SF70-002	SF70-002b	Jussey	Rue Thiers	47.8239	5.90325	220	Rural habitat	Francis Schaffner	SF70-002b_230811	2023-08-10	20:22:00	2023-08-11	09:16:00	Light trap	O			Small garden, unused, stone walls, dense vegetation	1	1	0
France	Haute-Saône	SF70-003	SF70-003a	Rosières-sur-Mance	Rte de la Corre	47.8349	5.79782	284	Rural habitat	Francis Schaffner	SF70-003a_230811	2023-08-10	20:55:00	2023-08-11	08:45:00	Light trap	I			Cellar unused house, ground floor, indoor	1	1	0
France	Haute-Saône	SF70-003	SF70-003b	Rosières-sur-Mance	Le Village	47.8356	5.79724	284	Rural habitat	Francis Schaffner	SF70-003b_230811	2023-08-10	21:06:00	2023-08-11	08:50:00	Light trap	O			Ruin, stone walls, near poultry	1	1	0
France	Haute-Saône	SF70-003	SF70-003c	Rosières-sur-Mance	Patis de la Chèvre	47.8356	5.79828	284	Rural habitat	Francis Schaffner	SF70-003c_230811	2023-08-10	21:18:00	2023-08-11	08:40:00	Light trap	O			Old barn with ground floor, ducks, poultry	1	1	0
France	Haute-Saône	SF70-003	SF70-003d	Rosières-sur-Mance	Rue des Cravattes	47.8363	5.79711	284	Rural habitat	Francis Schaffner	SF70-003d_230810	2023-08-10	21:55:00	2023-08-10	22:10:00	Human landing	O			Village, garden, stone walls, old pig house	1	0	0
France	Savoie	SF73-001	SF73-001a	Motz	Route des Vignes	45.9204	5.84455	715	Agriculture	Francis Schaffner + Trainees FR	SF73-001a_230704	2023-07-03	16:00:00	2023-07-04	09:30:00	Light trap	O/I			Inside ruin with partial roof, stone walls, shaded by trees	1	1	0
France	Savoie	SF73-001	SF73-001b	Motz	Route des Vignes	45.9205	5.8445	715	Agriculture	Francis Schaffner + Trainees FR	SF73-001b_230705	2023-07-03	16:28:00	2023-07-05	10:15:00	Sticky trap	O/I			Inside and outside ruin with partial roof, stone walls, shaded by trees	9	2	0
France	Savoie	SF73-002	SF73-002a	Motz	Route de Blinty	45.9185	5.84824	715	Rural habitat	Francis Schaffner + Trainees FR	SF73-002a_230704	2023-07-03	16:30:00	2023-07-04	09:41:00	Light trap	I			Indoor unused stable	1	1	13	1		1	11
France	Savoie	SF73-002	SF73-002b	Motz	Route de Blinty	45.9185	5.84828	715	Rural habitat	Francis Schaffner + Trainees FR	SF73-002b_230705	2023-07-04	09:45:00	2023-07-05	10:19:00	Sticky trap	O/I			Indoor/outdoor unused stable	4	1	0
France	Savoie	SF73-003	SF73-003a	Chindrieux	Rue de l'Eglise	45.8219	5.84917	336	Agriculture	Francis Schaffner + Trainees FR	SF73-003a_230704	2023-07-03	17:45:00	2023-07-04	09:05:00	Light trap	O			Garden, base large stone wall, crevace	1	1	4				4
France	Vosges	SF88-001	SF88-001a	Jubainville	Rue du Milieu	48.4607	5.74267	287	Rural habitat	Francis Schaffner	SF88-001a_230719	2023-07-19	14:24:00	2023-07-19	08:08:00	Light trap	O			Courtyard house and barns, in front of basement (ground soil) window	1	0	0
France	Vosges	SF88-001	SF88-001b	Jubainville	Rue du Milieu	48.4606	5.74268	287	Rural habitat	Francis Schaffner	SF88-001b_230719	2023-07-18	19:12:00	2023-07-19	08:13:00	Light trap	O			Barn (ground soil) and entrance cellar old house	1	1	0
France	Vosges	SF88-001	SF88-001c	Jubainville	Place de l'Eglise	48.4599	5.74237	287	Rural habitat	Francis Schaffner	SF88-001c_230719	2023-07-18	19:27:00	2023-07-19	08:15:00	Light trap	O/I			Entrance cellar ground soil, stone (partial) wall	1	1	0
France	Vosges	SF88-002	SF88-002a	Rollainville	Voie Morée	48.3626	5.73923	365	Rural habitat	Francis Schaffner	SF88-002a_230719	2023-07-18	20:19:00	2023-07-19	07:15:00	Light trap	O			Garden, base stone wall and rocks	1	1	0
France	Vosges	SF88-002	SF88-002b	Rollainville	Chemin de Fruze	48.3627	5.73916	365	Rural habitat	Francis Schaffner	SF88-002b_230719	2023-07-18	20:21:00	2023-07-19	07:19:00	Light trap	O			Garden, base rocks	1	1	0
France	Vosges	SF88-002	SF88-002c	Rollainville	Chemin de Fruze	48.3627	5.73904	365	Rural habitat	Francis Schaffner	SF88-002c_230719	2023-07-18	20:36:00	2023-07-19	07:22:00	Light trap	O			Garden, base rocks and stone wall	1	1	0
France	Vosges	SF88-003	SF88-003a	Châtillon-sur-Saône	Rue de l'Assaut	47.9479	5.88401	252	Rural habitat	Francis Schaffner	SF88-003a_230812	2023-08-11	19:05:00	2023-08-12	08:40:00	Light trap	O			Historical tour, stone walls, S exposed, near entrance	1	1	0
France	Vosges	SF88-003	SF88-003b	Châtillon-sur-Saône	Rue de l'Eglise, jardins en contrebas	47.9472	5.88472	252	Rural habitat	Francis Schaffner	SF88-003b_230812	2023-08-11	19:15:00	2023-08-12	08:45:00	Light trap	O			Stone walls, garden orchard, S exposed	1	1	1	1
France	Vosges	SF88-004	SF88-004a	Lironcourt	Rue de Charmont	47.9704	5.89116	237	Rural habitat	Francis Schaffner	SF88-004a_230812	2023-08-11	19:45:00	2023-08-12	08:25:00	Light trap	I			Old barn, ground floor, entrance door S exposed, indoor	1	1	2	2
France	Vosges	SF88-004	SF88-004b	Lironcourt	Rue de la Mairie	47.9693	5.89194	249	Rural habitat	Francis Schaffner	SF88-004b_230812	2023-08-11	19:55:00	2023-08-12	08:30:00	Light trap	O			Stone walls, ruin, S exposed	1	1	1	1
France	Territoire-de-Belfort	SF90-001	SF90-001a	Lachapelle-sous-Rougemont	Rue du Général de Gaulle, D83	47.7145	7.01886	384	Rural habitat	Francis Schaffner	SF90-001a_230818	2023-08-17	17:24:00	2023-08-18	08:00:00	Light trap	O			Farm, stone walls, near cattle barn and unused rabbit house, S exposed	1	1	0
France	Territoire-de-Belfort	SF90-001	SF90-001b	Lachapelle-sous-Rougemont	Rue du Général de Gaulle, D83	47.7144	7.01855	384	Rural habitat	Francis Schaffner	SF90-001b_230818	2023-08-17	17:30:00	2023-08-18	07:58:00	Light trap	O			Farm, near hen run, stone walls, S exposed	1	1	0
France	Territoire-de-Belfort	SF90-002	SF90-002a	Roppe	Avenue du Général de Gaulle, D83	47.6732	6.92489	365	Rural habitat	Francis Schaffner	SF90-002a_230818	2023-08-17	18:00:00	2023-08-18	08:20:00	Light trap	I			Abandoned farm house, barn entrance, S exposed, indoor	1	1	0
France	Territoire-de-Belfort	SF90-002	SF90-002b	Roppe	Avenue du Général de Gaulle, D83	47.6732	6.92495	365	Rural habitat	Francis Schaffner	SF90-002b_230818	2023-08-17	18:09:00	2023-08-18	08:23:00	Light trap	O			Abandoned farm house, entrance barn, wood pile, outdoor	1	1	1	1
France	Territoire-de-Belfort	SF90-003	SF90-003a	Felon	Rue de l'Eglise, D27	47.7061	6.97529	380	Rural habitat	Francis Schaffner	SF90-003a_230818	2023-08-17	18:37:00	2023-08-18	08:34:00	Light trap	I/O			Ruine, ground floor, stone walls	1	1	0
France	Territoire-de-Belfort	SF90-003	SF90-003b	Felon	Rue de l'Eglise, D27	47.7061	6.97531	380	Rural habitat	Francis Schaffner	SF90-003b_230818	2023-08-17	18:42:00	2023-08-18	08:32:00	Light trap	O			Ruine, stone wall and stone pile	1	1	0
France	Territoire-de-Belfort	SF90-003	SF90-003c	Felon	Rue de Chenois	47.7086	6.97798	391	Rural habitat	Francis Schaffner	SF90-003c_230818	2023-08-17	18:56:00	2023-08-18	08:42:00	Light trap	I			Open barn, partly ground floor, indoor	1	1	0
France	Territoire-de-Belfort	SF90-003	SF90-003d	Felon	Rue de Chenois	47.7085	6.97781	391	Rural habitat	Francis Schaffner	SF90-003d_230818	2023-08-17	19:03:00	2023-08-18	08:44:00	Light trap	O			Barn, S exposed, outdoor under roof	1	1	2	2
Belgium	Arr. Arlon	SFBE-001	SFBE-001a	Rachecourt	Rue Basse, N870	49.5899	5.72307	304	Rural habitat	Francis Schaffner + Trainees LU	SFBE-001a_230714	2023-07-13	18:13:00	2023-07-14	08:00:00	Light trap	O			House/garden, small barn	1	1	0
Belgium	Arr. Arlon	SFBE-001	SFBE-001b	Rachecourt	Rue Basse, N870	49.59	5.72325	304	Rural habitat	Francis Schaffner + Trainees LU	SFBE-001b_230714	2023-07-13	18:22:00	2023-07-14	08:05:00	Light trap	O			Garden, old garden shelter	1	1	0
Belgium	Arr. Arlon	SFBE-001	SFBE-001c	Rachecourt	Rue Bizeury	49.585	5.72028	304	Agriculture	Francis Schaffner + Trainees LU	SFBE-001c_230714	2023-07-13	18:00:00	2023-07-14	07:46:00	Light trap	I			Caw shelter in pasture, partly open, indoor	1	1	0
Belgium	Arr. Virton	SFBE-002	SFBE-002a	Signeulx	Rue du Ctre	49.5516	5.64072	238	Rural habitat	Francis Schaffner + Trainees LU	SFBE-002a_230714	2023-07-13	19:34:00	2023-07-14	08:38:00	Light trap	O			Garden, near rabits, old house, stone wall, shaded, S exposed	1	1	0
Belgium	Arr. Virton	SFBE-002	SFBE-002b	Signeulx	Rue du Ctre	49.5513	5.64052	238	Rural habitat	Francis Schaffner + Trainees LU	SFBE-002b_230714	2023-07-13	19:36:00	2023-07-14	08:39:00	Light trap	O			Garden, poultry run, goat shelter, dog and cats, S exposed	1	1	0
Belgium	Arr. Dinant	SFBE-003	SFBE-003a	Rochefort	Rue de Behogne	50.1609	5.22286	196	Urban habitat	Francis Schaffner + Trainees LU	SFBE-003a_230714	2023-07-13	20:30:00	2023-07-14	08:00:00	Light trap	O			Garden hotel, stone walls, shaded	1	1	0
Belgium	Arr. Dinant	SFBE-004	SFBE-004a	Rochefort	Rabanisse	50.1483	5.2365	227	Forest and shrub	Francis Schaffner + Trainees LU	SFBE-004a_230714	2023-07-13	19:15:00	2023-07-14	08:15:00	Light trap	O			Forest with wood pile	1	1	0
Belgium	Arr. Dinant	SFBE-005	SFBE-005a	Rochefort	Rabanisse	50.1484	5.23684	227	Agriculture	Francis Schaffner + Trainees LU	SFBE-005a_230714	2023-07-13	19:30:00	2023-07-14	08:00:00	Light trap	O/I			Metallic barn open, hey	1	1	0
Belgium	Arr. Neufchâteau	SFBE-006	SFBE-006a	Wellin	Rue de Grupont	50.0792	5.15519	220	Rural habitat	Francis Schaffner + Trainees LU	SFBE-006a_230714	2023-07-13	19:30:00	2023-07-14	08:45:00	Light trap	O			Garden, shelter with stone wallsm shaded	1	1	0
Belgium	Arr. Neufchâteau	SFBE-006	SFBE-006b	Wellin	Rue de Grupont	50.0791	5.15535	220	Rural habitat	Francis Schaffner + Trainees LU	SFBE-006b_230714	2023-07-13	19:55:00	2023-07-14	08:00:00	Light trap	O			Garden, shelter stone walls, nearby chicken run, shaded	1	1	0
Belgium	Arr. Neufchâteau	SFBE-006	SFBE-006c	Wellin	Rue de Grupont	50.0791	5.15564	220	Rural habitat	Francis Schaffner + Trainees LU	SFBE-006c_230714	2023-07-13	20:10:00	2023-07-14	09:05:00	Light trap	O			Garden, stone wall, forest shaded	1	1	0
Belgium	Arr. Neufchâteau	SFBE-007	SFBE-007a	Wellin	Rue de la Boverie	50.0813	5.15015	220	Rural habitat	Francis Schaffner + Trainees LU	SFBE-007a_230714	2023-07-13	20:20:00	2023-07-14	09:15:00	Light trap	I			Stone barn	1	1	0
Belgium	Arr. Neufchâteau	SFBE-007	SFBE-007b	Wellin	Rue de la Boverie	50.0813	5.15028	220	Rural habitat	Francis Schaffner + Trainees LU	SFBE-007b_230714	2023-07-14	21:30:00	2023-07-14	09:05:00	Light trap	I			Stone barn	1	0	0
Belgium	Arr. Liège	SFBE-008	SFBE-008a	Visé	Rue de Jupille, N653, Visé Pneus	50.7249	5.69426	131	Suburban habitat	Francis Schaffner + Trainees LU	SFBE-008a_230715	2023-07-14	15:58:00	2023-07-15	09:50:00	Light trap	O			Base cliff, shaded, E exposed	1	1	0
Belgium	Arr. Liège	SFBE-008	SFBE-008b	Visé	Rue de Jupille, N653, Visé Pneus	50.7246	5.6947	131	Suburban habitat	Francis Schaffner + Trainees LU	SFBE-008b_230715	2023-07-14	16:08:00	2023-07-15	09:50:00	Light trap	O		Trap off	Base cliff, forest shaded, W exposed	1	1	0
Belgium	Arr. Liège	SFBE-008	SFBE-008c	Visé	Rue de Jupille, N653	50.7252	5.69411	114	Suburban habitat	Francis Schaffner + Trainees LU	SFBE-008c_230715	2023-07-14	16:35:00	2023-07-15	10:00:00	Light trap	O			Base cliff, vegetation, NW exposed	1	1	0
Belgium	Arr. Liège	SFBE-008	SFBE-008d	Visé	Rue de Jupille, N653	50.7252	5.69406	114	Suburban habitat	Francis Schaffner + Trainees LU	SFBE-008d_230715	2023-07-14	16:49:00	2023-07-15	11:00:00	Light trap	O			Garden, unused chicken run	1	1	0
Belgium	Arr. Liège	SFBE-008	SFBE-008e	Visé	Rue de Jupille, N653	50.725	5.69468	114	Suburban habitat	Francis Schaffner + Trainees LU	SFBE-008e_230715	2023-07-14	16:36:00	2023-07-15	10:55:00	Light trap	O			Garden, unused shiken run	1	1	0
Belgium	Arr. Liège	SFBE-008	SFBE-008f	Visé	Rue de Jupille, N653	50.7258	5.69411	114	Suburban habitat	Francis Schaffner + Trainees LU	SFBE-008f_230715	2023-07-14	16:59:00	2023-07-15	11:05:00	Light trap	O			Garden, rock, besides unused henhouse	1	1	0
Belgium	Arr. Liège	SFBE-009	SFBE-009a	Blegny	Saive, Chemin de la Julienne	50.6535	5.68415	207	Rural habitat	Francis Schaffner + Trainees LU	SFBE-009a_230715	2023-07-14	21:14:00	2023-07-15	07:40:00	Light trap EVS	O	Yes		Garden, rabbit run, chicken run, duck run	1	1	0
Belgium	Arr. Virton	SFBE-010	SFBE-010a	Florenville	Sainte-Cécile, Rue de la Mécanique	49.7297	5.24357	305	Rural habitat	Francis Schaffner + Trainees LU	SFBE-010a_230716	2023-07-15	18:51:00	2023-07-16	10:30:00	Light trap	I			Cellar 1, ground soil, humid	1	1	0
Belgium	Arr. Virton	SFBE-010	SFBE-010b	Florenville	Sainte-Cécile, Rue de la Mécanique	49.7298	5.2435	305	Rural habitat	Francis Schaffner + Trainees LU	SFBE-010b_230716	2023-07-15	19:03:00	2023-07-16	10:30:00	Light trap	I			Cellar 2 (deeper), ground soil and rock, humid	1	1	0
Belgium	Arr. Virton	SFBE-010	SFBE-010c	Florenville	Sainte-Cécile, Rue de la Mécanique	49.7297	5.24349	305	Rural habitat	Francis Schaffner + Trainees LU	SFBE-010c_230716	2023-07-15	19:04:00	2023-07-16	10:25:00	Light trap	I			Barn, henhouse	1	1	0
Belgium	Arr. Virton	SFBE-010	SFBE-010d	Florenville	Sainte-Cécile, Rue de la Mécanique	49.7298	5.24317	305	Rural habitat	Francis Schaffner + Trainees LU	SFBE-010d_230716	2023-07-15	19:12:00	2023-07-16	10:06:00	Light trap	O/I		Trap off	Barn, open, ground soils, chiks, dog	1	1	0
Belgium	Arr. Virton	SFBE-010	SFBE-010e	Florenville	Sainte-Cécile, Rue de la Mécanique	49.7294	5.24331	305	Rural habitat	Francis Schaffner + Trainees LU	SFBE-010e_230716	2023-07-15	19:23:00	2023-07-16	10:09:00	Light trap	O			Garden, wooden shelter	1	1	0
Belgium	Arr. Virton	SFBE-011	SFBE-011a	Florenville	Chassepierre, Rue de la Semois	49.7071	5.26296	343	Rural habitat	Francis Schaffner + Trainees LU	SFBE-011a_230716	2023-07-15	19:49:00	2023-07-16	10:44:00	Light trap	O			Cave entrance	1	1	0
Belgium	Arr. Virton	SFBE-011	SFBE-011b	Florenville	Chassepierre, Rue de la Semois	49.707	5.26309	343	Rural habitat	Francis Schaffner + Trainees LU	SFBE-011b_230716	2023-07-15	19:52:00	2023-07-16	10:45:00	Light trap	O/I			Cave entrance	1	1	0
Belgium	Arr. Virton	SFBE-011	SFBE-011c	Florenville	Chassepierre, Rue de la Semois	49.7093	5.26154	291	Rural habitat	Francis Schaffner + Trainees LU	SFBE-011c_230716	2023-07-15	20:20:00	2023-07-16	10:53:00	Light trap	O/I			Wood shelter in between two houses	1	1	0
Belgium	Arr. Virton	SFBE-011	SFBE-011d	Florenville	Chassepierre, Rue de la Semois	49.7093	5.26112	291	Rural habitat	Francis Schaffner + Trainees LU	SFBE-011d_230716	2023-07-15	20:20:00	2023-07-16	10:54:00	Light trap	O			Entrance small shelter cattle dung	1	1	0
Belgium	Arr. Virton	SFBE-011	SFBE-011e	Florenville	Chassepierre, Rue de la Semois	49.7087	5.26218	291	Rural habitat	Francis Schaffner + Trainees LU	SFBE-011e_230716	2023-07-15	20:29:00	2023-07-16	10:45:00	Light trap	O			Garden, stone wall, E exposed	1	1	0
Belgium	Arr. Virton	SFBE-011	SFBE-011f	Florenville	Chassepierre, Rue de la Semois	49.7085	5.2623	291	Rural habitat	Francis Schaffner + Trainees LU	SFBE-011f_230716	2023-07-15	20:35:00	2023-07-16	10:45:00	Light trap	O			Garden, stone wall, shaded, S exposed	1	1	0
Germany	Trier-Saarburg	SFDE-001	SFDE-001a	Nittel	Leiterchen, Nitteler Fels	49.6633	6.43935	273	Agriculture	Francis Schaffner + Trainees LU	SFDE-001a_230713	2023-07-12	18:31:00	2023-07-13	08:40:00	Light trap	O	Yes		Garden, base cliff, nearby wineyard, shaded, S exposed	1	1	1	1
Germany	Trier-Saarburg	SFDE-001	SFDE-001b	Nittel	Leiterchen, Nitteler Fels	49.6634	6.43883	273	Agriculture	Francis Schaffner + Trainees LU	SFDE-001b_230713	2023-07-12	18:38:00	2023-07-13	08:45:00	Light trap	O			Garden, base cliff, open, S exposed	1	1	0
Germany	Trier-Saarburg	SFDE-001	SFDE-001c	Nittel	Leiterchen, Nitteler Fels	49.6634	6.43833	273	Agriculture	Francis Schaffner + Trainees LU	SFDE-001c_230713	2023-07-12	18:48:00	2023-07-13	08:50:00	Light trap	O			Garden, rocks, shaded, S exposed	1	1	0
Germany	Trier-Saarburg	SFDE-001	SFDE-001d	Nittel	Leiterchen, Nitteler Fels	49.6633	6.43884	273	Agriculture	Francis Schaffner + Trainees LU	SFDE-001d_230713	2023-07-12	18:50:00	2023-07-13	08:55:00	Light trap	O			Garden, stone wall, S exposed	1	1	0
Germany	Trier-Saarburg	SFDE-002	SFDE-002a	Nittel	Leiterchen, Near Mossel, rail and R419	49.6615	6.43592	273	Forest and shrub	Francis Schaffner + Trainees LU	SFDE-002a_230713	2023-07-12	20:04:00	2023-07-13	09:00:00	Light trap	O			Bush, besides animal burrow, near cliff, S exposed	1	1	0
Germany	Trier-Saarburg	SFDE-002	SFDE-002b	Nittel	Leiterchen, Near Mossel, rail and R419	49.6618	6.43663	273	Forest and shrub	Francis Schaffner + Trainees LU	SFDE-002b_230713	2023-07-12	20:13:00	2023-07-13	09:05:00	Light trap	O			Base rocks bordering wineyard, E exposed	1	1	0
Luxembourg	Luxembourg	SFLU-001	SFLU-001a	Luxembourg	Grund, Rue Münster	49.6103	6.13563	275	Suburban habitat	Francis Schaffner + Trainees LU	SFLU-001a_230711	2023-07-10	18:49:00	2023-07-11	08:52:00	Light trap	I			Garden garage, indoor	1	1	0
Luxembourg	Luxembourg	SFLU-001	SFLU-001b	Luxembourg	Grund, Rue Plaetis	49.6115	6.13718	275	Suburban habitat	Francis Schaffner + Trainees LU	SFLU-001b_230711	2023-07-10	19:03:00	2023-07-11	09:40:00	Light trap	O			Stone wall, garden, S exposed	1	1	0
Luxembourg	Luxembourg	SFLU-001	SFLU-001c	Luxembourg	Grund, Rue Plaetis	49.6113	6.13699	275	Suburban habitat	Francis Schaffner + Trainees LU	SFLU-001c_230711	2023-07-10	19:06:00	2023-07-11	09:41:00	Light trap	O			Garden, besides wooden schelter, SE exposed	1	1	0
Luxembourg	Luxembourg	SFLU-001	SFLU-001d	Luxembourg	Grund, Rue Plaetis	49.6109	6.13593	275	Suburban habitat	Francis Schaffner + Trainees LU	SFLU-001d_230711	2023-07-10	19:14:00	2023-07-11	09:45:00	Light trap	I			Small cave stone wall, along path, shaded, SE exposed	1	1	0
Luxembourg	Luxembourg	SFLU-001	SFLU-001e	Luxembourg	Grund, Rue Plaetis	49.611	6.13571	275	Suburban habitat	Francis Schaffner + Trainees LU	SFLU-001e_230711	2023-07-10	19:23:00	2023-07-11	09:56:00	Light trap	O			Stone wall, garden, shaded, near honey bee colonies, SE exposed	1	1	0
Luxembourg	Luxembourg	SFLU-001	SFLU-001f	Luxembourg	Grund, Rives de Clausen	49.6116	6.13788	275	Suburban habitat	Francis Schaffner + Trainees LU	SFLU-001f_230711	2023-07-10	19:38:00	2023-07-11	10:04:00	Light trap	O/I			Cave entrance, S exposed	1	1	0
Luxembourg	Luxembourg	SFLU-001	SFLU-001g	Luxembourg	Grund, Rives de Clausen	49.6118	6.13758	275	Suburban habitat	Francis Schaffner + Trainees LU	SFLU-001g_230711	2023-07-10	19:50:00	2023-07-11	10:04:00	Light trap	O			Base cliff, S exposed	1	1	0
Luxembourg	Luxembourg	SFLU-001	SFLU-001h	Luxembourg	Grund, Rives de Clausen	49.6116	6.13748	275	Suburban habitat	Francis Schaffner + Trainees LU	SFLU-001h_230711	2023-07-10	19:46:00	2023-07-11	10:04:00	Light trap	O			Stone walls, S exposed	1	1	0
Luxembourg	Luxembourg	SFLU-001	SFLU-001i	Luxembourg	Grund, Bisserweg	49.6082	6.13779	274	Suburban habitat	Francis Schaffner + Trainees LU	SFLU-001i_230711	2023-07-10	20:14:00	2023-07-11	09:23:00	Light trap	O/I			Cave entrance, S exposed	1	1	0
Luxembourg	Luxembourg	SFLU-001	SFLU-001j	Luxembourg	Grund, Bisserweg	49.6082	6.13894	274	Suburban habitat	Francis Schaffner + Trainees LU	SFLU-001j_230711	2023-07-10	20:22:00	2023-07-11	09:23:00	Light trap	O			Cliff base, SE exposed	1	1	0
Luxembourg	Luxembourg	SFLU-001	SFLU-001k	Luxembourg	Grund, Rue St Ulric	49.6073	6.13649	274	Suburban habitat	Francis Schaffner + Trainees LU	SFLU-001k_230711	2023-07-10	20:40:00	2023-07-11	09:19:00	Light trap	O/I			Ruin open cellar	1	1	0
Luxembourg	Luxembourg	SFLU-001	SFLU-001l	Luxembourg	Grund, Rue St Ulric	49.6072	6.1364	274	Suburban habitat	Francis Schaffner + Trainees LU	SFLU-001l_230711	2023-07-10	20:40:00	2023-07-11	09:18:00	Light trap	O/I			Cave base cliff with pigeon feaces	1	1	0
Luxembourg	Luxembourg	SFLU-002	SFLU-002a	Remich	Rue Dicks	49.5479	6.37251	148	Suburban habitat	Francis Schaffner + Trainees LU	SFLU-002a_230712	2023-07-11	17:52:00	2023-07-12	08:42:00	Light trap	O			Garden, base cliff, open, E exposed	1	1	0
Luxembourg	Luxembourg	SFLU-002	SFLU-002aa	Remich	Rue Dicks	49.5479	6.37251	148	Suburban habitat	Francis Schaffner + Trainees LU	SFLU-002aa_230713	2023-07-12	16:59:00	2023-07-13	09:05:00	Light trap	O			Garden, base cliff, open, E exposed	1	1	0
Luxembourg	Luxembourg	SFLU-002	SFLU-002b	Remich	Rue Dicks	49.5475	6.37206	148	Suburban habitat	Francis Schaffner + Trainees LU	SFLU-002b_230712	2023-07-11	17:59:00	2023-07-12	08:38:00	Light trap	O			Industrial area, base cliff, open, E exposed	1	1	1	1
Luxembourg	Luxembourg	SFLU-002	SFLU-002bb	Remich	Rue Dicks	49.5475	6.37206	148	Suburban habitat	Francis Schaffner + Trainees LU	SFLU-002bb_230713	2023-07-12	16:55:00	2023-07-13	08:55:00	Light trap	O			Industrial area, base cliff, open, E exposed	1	1	1	1
Luxembourg	Luxembourg	SFLU-002	SFLU-002c	Remich	Rue Dicks	49.548	6.37241	148	Suburban habitat	Francis Schaffner + Trainees LU	SFLU-002c_230712	2023-07-11	18:22:00	2023-07-12	08:42:00	Light trap	O			Garden, base cliff, shaded, E exposed	1	1	2	2
Luxembourg	Luxembourg	SFLU-002	SFLU-002cc	Remich	Rue Dicks	49.548	6.37241	148	Suburban habitat	Francis Schaffner + Trainees LU	SFLU-002cc_230713	2023-07-12	16:41:00	2023-07-13	08:50:00	Light trap	O	Yes		Garden, base cliff, shaded, E exposed	1	1	0
Luxembourg	Luxembourg	SFLU-002	SFLU-002d	Remich	Rue Dicks	49.5473	6.37175	148	Suburban habitat	Francis Schaffner + Trainees LU	SFLU-002d_230712	2023-07-11	21:28:00	2023-07-12	09:00:00	Light trap	O			Forest, shaded, top cliff	1	1	0
Luxembourg	Luxembourg	SFLU-002	SFLU-002e	Remich	Rue Dicks	49.5462	6.36864	148	Suburban habitat	Francis Schaffner + Trainees LU	SFLU-002e_230712	2023-07-11	21:38:00	2023-07-12	09:03:00	Light trap	O			Garden, shaded, near chicken run	1	1	0
Luxembourg	Luxembourg	SFLU-002	SFLU-002f	Remich	Rue Dicks	49.5481	6.37249	148	Suburban habitat	Francis Schaffner + Trainees LU	SFLU-002f_230713	2023-07-12	16:41:00	2023-07-13	09:07:00	Light trap	O	Yes		Garden, base cliff, shaded, E exposed	1	1	0
Luxembourg	Luxembourg	SFLU-002	SFLU-002g	Remich	Rue Dicks	49.5477	6.37264	148	Suburban habitat	Francis Schaffner + Trainees LU	SFLU-002g_230713	2023-07-12	16:56:00	2023-07-13	09:08:00	Sticky trap	O			Garden, base cliff and wood pile	19	1	0
Luxembourg	Luxembourg	SFLU-003	SFLU-003a	Machtum	Rue Gewan	49.6563	6.42708	163	Agriculture	Francis Schaffner + Trainees LU	SFLU-003a_230712	2023-07-11	22:25:00	2023-07-12	08:50:00	Light trap	O	Yes		Barn in meadow/pasture	1	1	0
Luxembourg	Luxembourg	SFLU-003	SFLU-003b	Machtum	Rue Gewan	49.6563	6.42769	163	Agriculture	Francis Schaffner + Trainees LU	SFLU-003b_230712	2023-07-11	22:28:00	2023-07-12	08:55:00	Light trap	O			Cattle pasture, in trees	1	1	0
Luxembourg	Luxembourg	SFLU-004	SFLU-004a	Bech-Kleinmacher	Kuebeneck	49.5301	6.35493	142	Rural habitat	Francis Schaffner + Trainees LU	SFLU-004a_230713	2023-07-12	16:01:00	2023-07-13	09:29:00	Light trap	O			Garden, besides barn, stone wall, N exposed	1	1	0
Luxembourg	Luxembourg	SFLU-004	SFLU-004b	Bech-Kleinmacher	Kuebeneck	49.5302	6.35492	142	Rural habitat	Francis Schaffner + Trainees LU	SFLU-004b_230713	2023-07-12	16:00:00	2023-07-13	09:29:00	Light trap	O			Garden, barn stone wall, E exposed	1	1	0
Luxembourg	Luxembourg	SFLU-004	SFLU-004c	Bech-Kleinmacher	Kuebeneck	49.5301	6.35499	142	Rural habitat	Francis Schaffner + Trainees LU	SFLU-004c_230713	2023-07-12	16:04:00	2023-07-13	09:29:00	Light trap	O			Garden, barn stone wall, E exposed	1	1	1	1
Netherlands	Zuid-Limburg	SFNL-001	SFNL-001a	Maastricht	Sit- Pieter, Muizenberg	50.8172	5.66519	59	Agriculture	Francis Schaffner + Trainees LU	SFNL-001a_230715	2023-07-14	18:01:00	2023-07-15	09:50:00	Light trap	O/I		Trap off	Cliff, entrance cave	1	1	0
Netherlands	Zuid-Limburg	SFNL-001	SFNL-001b	Maastricht	Sit- Pieter, Muizenberg	50.8172	5.66506	59	Agriculture	Francis Schaffner + Trainees LU	SFNL-001b_230715	2023-07-14	18:06:00	2023-07-15	09:55:00	Light trap	O			Base cliff	1	1	0
Netherlands	Zuid-Limburg	SFNL-001	SFNL-001c	Maastricht	Sit- Pieter, Muizenberg	50.8172	5.66496	59	Agriculture	Francis Schaffner + Trainees LU	SFNL-001c_230715	2023-07-14	18:08:00	2023-07-15	10:00:00	Light trap	O			Base cliff	1	1	0
Netherlands	Zuid-Limburg	SFNL-001	SFNL-001d	Maastricht	Sit- Pieter, Muizenberg	50.8173	5.66462	59	Agriculture	Francis Schaffner + Trainees LU	SFNL-001d_230715	2023-07-14	18:19:00	2023-07-15	10:05:00	Light trap	O			Base cliff and besides animal burrow	1	1	0
Netherlands	Zuid-Limburg	SFNL-002	SFNL-002a	Maastricht	Sint Antoniusbank, Kackerboshweg	50.8319	5.77783	131	Nature-other	Francis Schaffner + Trainees LU	SFNL-002a_230715	2023-07-14	19:13:00	2023-07-15	10:20:00	Light trap	O			Base small cliff (protected area)	1	1	0
Netherlands	Zuid-Limburg	SFNL-003	SFNL-003a	Maastricht	Sint Antoniusbank, Kackerboshweg	50.8417	5.76966	127	Agriculture	Francis Schaffner + Trainees LU	SFNL-003a_230715	2023-07-14	20:05:00	2023-07-15	10:30:00	Light trap	O	Yes		Base small cliff and small holes in sandy soil	1	1	0
Netherlands	Zuid-Limburg	SFNL-003	SFNL-003b	Maastricht	Sint Antoniusbank, Kackerboshweg	50.8421	5.76904	127	Agriculture	Francis Schaffner + Trainees LU	SFNL-003b_230715	2023-07-14	20:06:00	2023-07-15	10:40:00	Light trap	O			Entrance cave	1	1	0
Netherlands	Zuid-Limburg	SFNL-003	SFNL-003c	Maastricht	Sint Antoniusbank, Kackerboshweg	50.8396	5.77349	128	Agriculture	Francis Schaffner + Trainees LU	SFNL-003c_230715	2023-07-14	20:12:00	2023-07-15	10:50:00	Light trap	O/I			Rocks and stome wall, entrance ruin	1	1	0
5	21	58	179																		208	168	55	37	2	1	15

## Sheet: ESM
Supplementary online material of the Journal of the European Mosquito Control Association
DOI: https://doi.org/10.52004/2054930X-20241008
A survey of Phlebotomine sand flies across their northern distribution range limit in Western Europe
J. Risueño, S. Bersihand, C. Bender, T. Cornen, K. De Boer, A. Ibáñez-Justicia, D. Rey, Y. Rozier, A. Schneider, A. Stroo, A.
Vanslembrouck, W. Van Bortel, A. Weigand, D. Zambianchi, P. Pérez Cutillas, S. Oerther, M. Braks, G.R.W. Wint, E. Berriatua and F.
Schaffner
