# Supplementary material
Source: publisher figshare collection journal article supplement (https://brill.figshare.com/articles/dataset/_/25690455)
Supplement: Supplementary file 1 [file 1]

# A survey of Phlebotomine sand flies across their northern distribution range limit in Western Europe

J. Risueño, S. Bersihand, C. Bender, T. Cornen, K. De Boer, A. Ibáñez-Justicia, D. Rey, Y. Rozier, A. Schneider, A. Stroo, A. Vanslebrouck, W. Van Bortel, A. Weigand, D. Zambianchi, P. Pérez Cutillas, S. Oerther, M. Braks, G.R.W. Wint, E. Berriatua and F. Schaffner

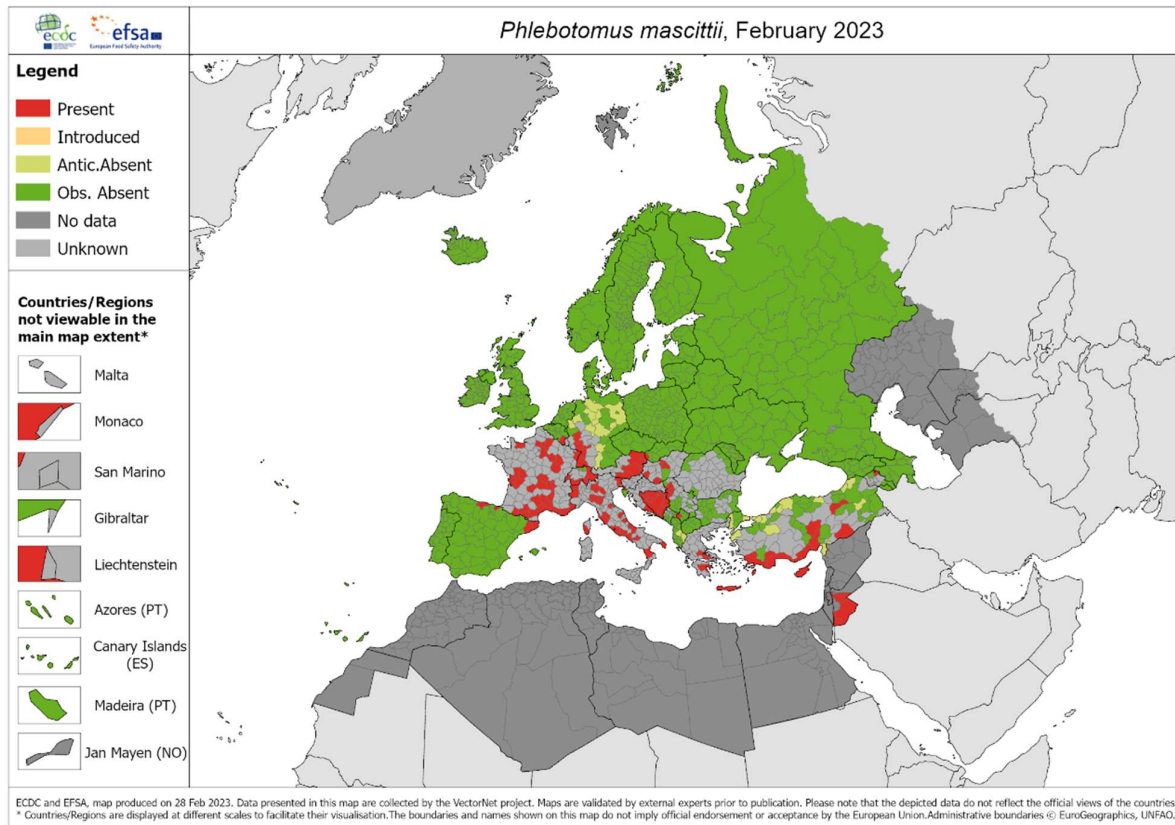

**Figure S1.** Distribution of *Phlebotomus mascittii* in Europe and neighbouring countries. Source: ECDC/VectorNet (<https://www.ecdc.europa.eu/en/publications-data/phlebotomus-mascittii-current-known-distribution-february-2023>).

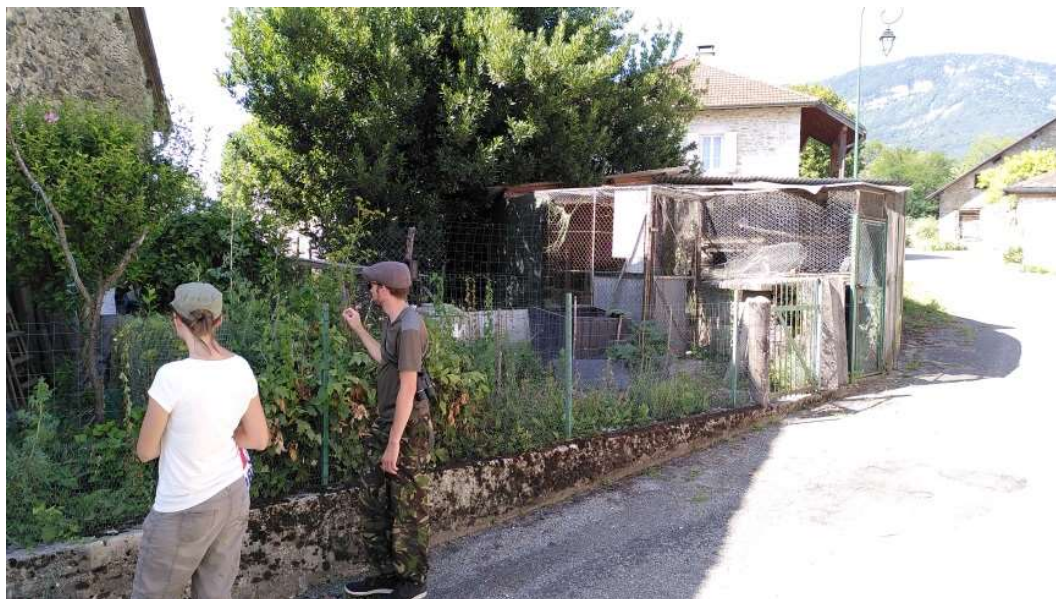

**Figure S2.** Sand fly sampling site in Ain (Ceyzérieu), France (henhouse and garden; SF01-001; 04/07/2023).



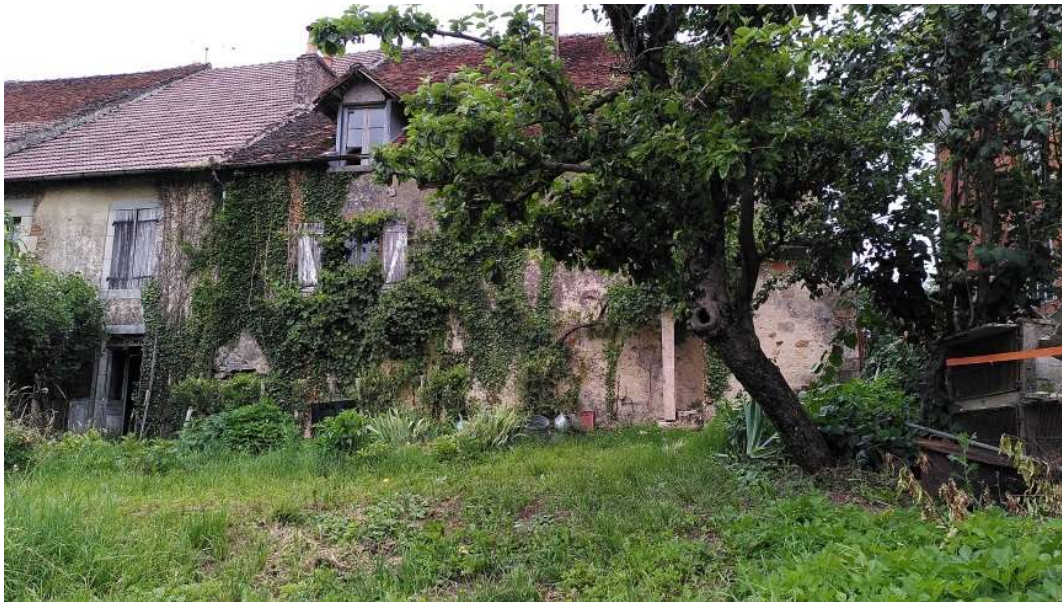

**Figure S3.** Sand fly sampling site in Jura (Montigny-lès-Arsures), France (uninhabited house; SF39-003; 08/07/2023).

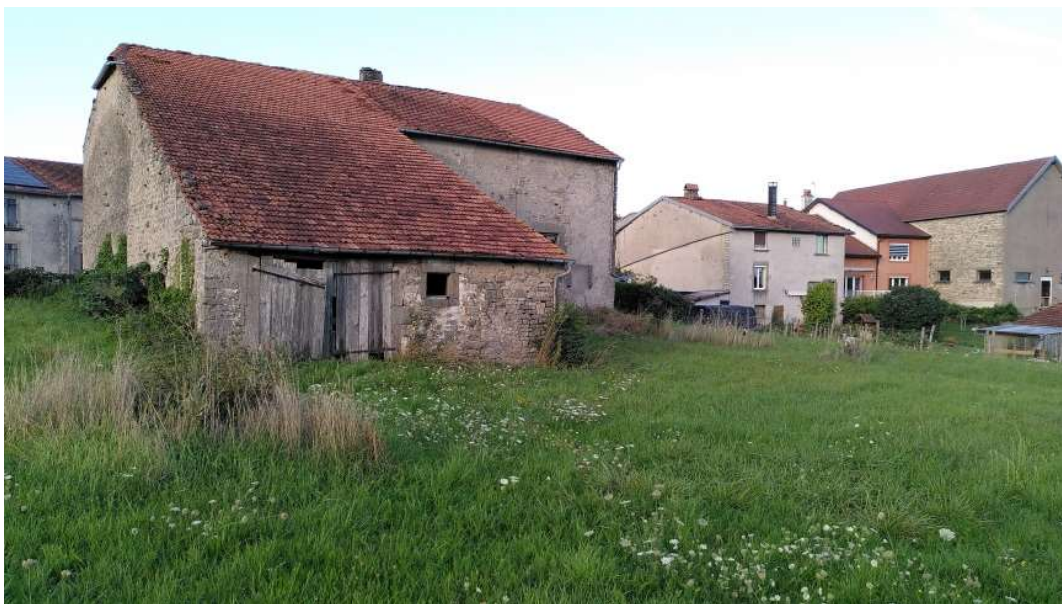

**Figure S4.** Sand fly sampling site in Vosges (Lironcourt), France (old barn with ground floor; SF88-004; 11.08.2023).



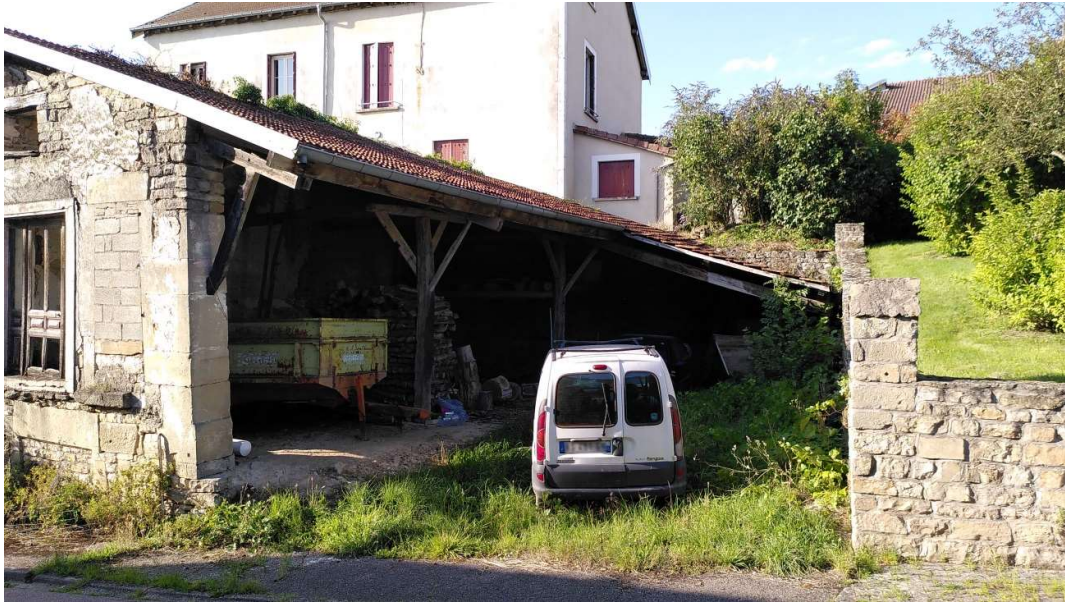

**Figure S5.** Sand fly sampling site in Haute-Marne (Fresne-sur-Apance), France (semi-open old barn with ground floor; SF52-002; 11/08/2023).

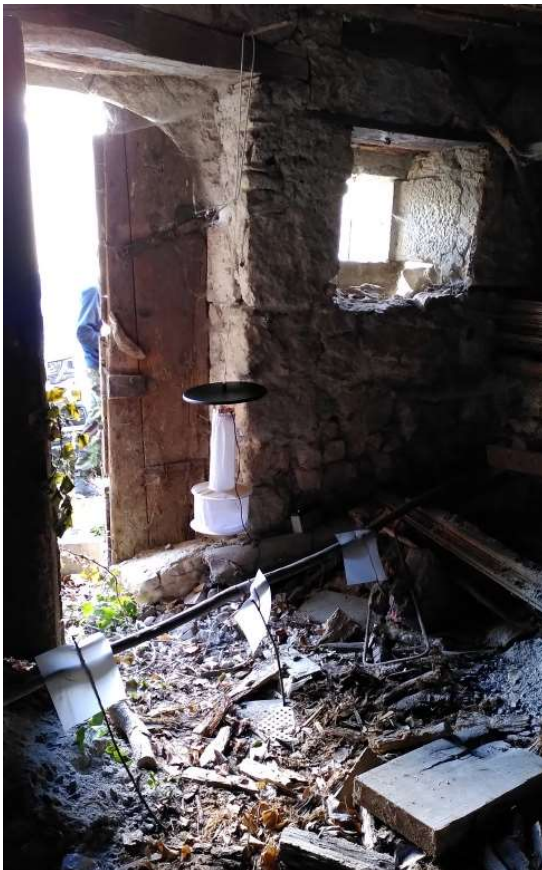

**Figure S6.** Sand fly sampling site in Savoie (Motz), France (unused stable; SF73-002; 04/07/2023).



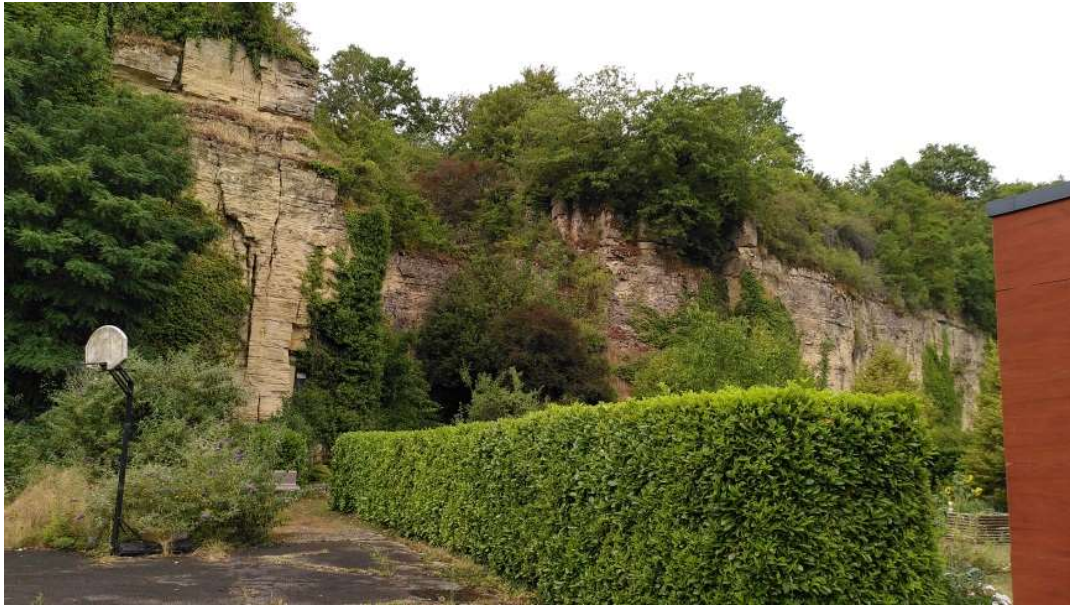

**Figure S7.** Sand fly sampling site in Remich, Luxembourg (cliff base and garden; SFLU-002; 11/07/2023).

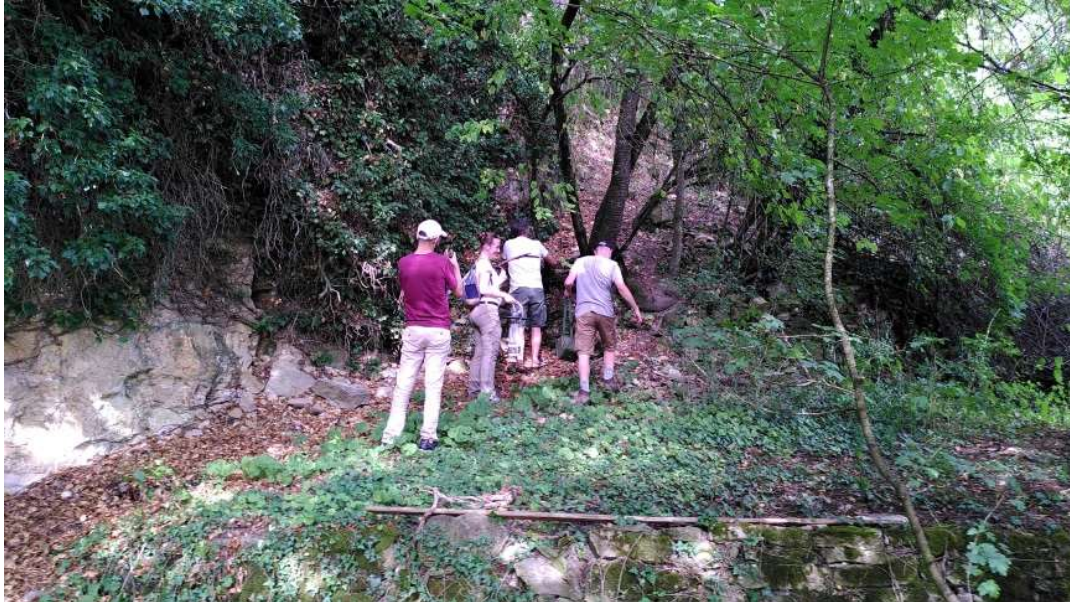

**Figure S8.** Sand fly sampling site in Trier-Saarburg (Nittel), Germany (cliff base and garden; SFDE-001; 12/07/2023).
